# Supplementary material for: Fenfluramine in clinical practice: new therapy option for Dravet and Lennox–Gastaut syndromes
Source: Springer Nature journal article supplement (doi:10.1007/s10309-023-00646-5), 2024-01-03
Supplement: MOESM1 [file 26588486]

Supplementary Table S1: A: Dosage table with values in ml for patients not taking stiripentol (from the Fintepla® prescribing information, as of December 2020). B: Dosage table with values in ml for patients taking stiripentol.

| A: Recommended titration scheme without stiripentol |                                                                  |                                                               |        |        |        |        |        |        |
|-----------------------------------------------------|------------------------------------------------------------------|---------------------------------------------------------------|--------|--------|--------|--------|--------|--------|
|                                                     | Dose for 2 x daily administration (mg/kg)                        | Fenfluramine 2.2 mg/ml = Fenfluramine hydrochloride 2.5 mg/ml |        |        |        |        |        |        |
| Weight (kg)                                         |                                                                  | 10                                                            | 15     | 20     | 25     | 30     | 35     | 40     |
| Start dose                                          | 0.1 mg/kg bw                                                     | 0.5 ml                                                        | 0.6 ml | 0.8 ml | 1.0 ml | 1.3 ml | 1.5 ml | 1.7 ml |
| Day 7                                               | 0.2 mg/kg bw                                                     | 0.8 ml                                                        | 1.2 ml | 1.6 ml | 2.0 ml | 2.4 ml | 2.8 ml | 3.2 ml |
| Day 14                                              | 0.35 mg/kg bw                                                    | 1.6 ml                                                        | 2.4 ml | 3.2 ml | 4.0 ml | 4.8 ml | 5.6 ml | 6.0 ml |
|                                                     | For body weight of 45 kg and above titration can be approximated |                                                               |        |        |        |        |        |        |
| Start dose                                          | Approximately 0.1 mg/kg bw                                       | 2 ml                                                          |        |        |        |        |        |        |
| Day 7                                               | Approximately 0.2 mg/kg bw                                       | 4 ml                                                          |        |        |        |        |        |        |
| Day 14                                              | Approximately 0.35 mg/kg bw                                      | 6 ml                                                          |        |        |        |        |        |        |

B: Recommended titration scheme with stiripentol

|             | Dose for 2 x daily administration (mg/kg)                        | Fenfluramine 2.2 mg/ml = Fenfluramine hydrochloride 2.5 mg/ml |        |        |        |        |        |        |
|-------------|------------------------------------------------------------------|---------------------------------------------------------------|--------|--------|--------|--------|--------|--------|
| Weight (kg) |                                                                  | 10                                                            | 15     | 20     | 25     | 30     | 35     | 40     |
| Start dose  | 0.1 mg/kg bw                                                     | 0.5 ml                                                        | 0.6 ml | 0.8 ml | 1.0 ml | 1.3 ml | 1.5 ml | 1.7 ml |
| Day 7       | 0.2 mg/kg bw                                                     | 1.0 ml                                                        | 1.5 ml | 2.0 ml | 2.5 ml | 3.0 ml | 3.6 ml | 4.0 ml |
|             | For body weight of 45 kg and above titration can be approximated |                                                               |        |        |        |        |        |        |
| Start dose  | Approximately 0.1 mg/kg bw                                       | 2 ml                                                          |        |        |        |        |        |        |
| Day 7       | Approximately 0.2 mg/kg bw                                       | 4 ml                                                          |        |        |        |        |        |        |

*Supplementary Table S2: Reported adverse events during the FFA study (Medical Dictionary for Regulatory Activities, MedDRA) by frequency. MR = Mitral valve regurgitation, AR = Aortic valve regurgitation.*

| MedDRA-organ class                                       | Very common                                                                                                              | Common                             |
|----------------------------------------------------------|--------------------------------------------------------------------------------------------------------------------------|------------------------------------|
| Infections and Parasitic diseases                        | Bronchitis<br>Upper respiratory tract infection                                                                          | Ear infection                      |
| Metabolic disorders / Feeding disorders                  | Decreased appetite                                                                                                       |                                    |
| Psychiatric disorders                                    |                                                                                                                          | Abnormal behaviour<br>Irritability |
| Nervous system disorders                                 | Lethargy<br>Somnolence<br>Status epilepticus                                                                             |                                    |
| Gastrointestinal disorders                               | Obstipation<br>Diarrhoea<br>Vomiting                                                                                     |                                    |
| General disorders / Discomfort                           | Pyrexia<br>Fatigue                                                                                                       |                                    |
| Investigations                                           | Lower blood glucose level<br>Abnormal echocardiographic signs (trace regurgitation, MR or AR)<br>Decrease in body weight |                                    |
| Injury, Intoxication, Procedure-associated complications | Falls                                                                                                                    |                                    |
